# Supplementary material
Source: publisher site journal article supplement (https://www.dovepress.com/get_supplementary_file.php?f=253386.xlsx)
Supplement: Supplementary file 1 [file get_supplementary_file.php]

## Sheet: 417 significantly upregulated
Table S1: Genes significantly upregulated with 1% oat under aerobic conditions in S. epidermidis
Symbol	FC (Treatment/Aerobic)	FDR	Synonym	Gene product	Description
SE0626	1762.87	1.52208e-18	SE0626	D-alanine--poly(phosphoribitol) ligase subunit 2	Part of cell wall biogenesis. Catalyzes the first step in the D-alanylation of lipoteichoic acid (LTA), the activation of D-alanine and its transfer onto the D-alanyl carrier protein (Dcp) DltC. In an ATP-dependent two-step reaction, forms a high energy D-alanyl-AMP intermediate, followed by transfer of the D-alanyl residue as a thiol ester to the phosphopantheinyl prosthetic group of the Dcp. D-…
SE0066	521.474	0.000345971	SE0066	transposase
SE0147	498.88	6.47064e-06	SE0147	hypothetical protein
SE1360	491.45	6.37096e-06	SE1360	transcriptional regulator NrdR
SE0048	486.833	2.55356e-05	SE0048	hypothetical protein
SE1592	448.351	3.14031e-05	SE1592	hypothetical protein
SE1127	442.34	2.04439e-05	SE1127	cell wall enzyme EbsB
SE1000	406.975	5.26374e-05	SE1000	two-component sensor histidine kinase
SE1203	405.01	0.00101746	SE1203	exodeoxyribonuclease VII small subunit
SE2369	399.099	0.00111959	SE2369	hypothetical protein
SE1536	390.521	0.000109269	SE1536	hypothetical protein
SE0633	387.756	6.43704e-05	SE0633	hypothetical protein
SE1307	383.324	0.000124272	SE1307	hypothetical protein
SE1762	381.15	0.000196565	SE1762	hypothetical protein
SE1044	358.584	9.74578e-05	SE1044	transposase
SE1465	354.614	0.00228438	SE1465	hypothetical protein
SE2297	352.297	0.000124272	SE2297	DNA replication intiation control protein YabA
SE0638	345.578	0.00248005	SE0638	hypothetical protein
SE0736	338.851	0.000652878	SE0736	hypothetical protein
SE1151	305.253	0.000373733	SE1151	hypothetical protein
SEt11	302.801	0.00417577	SEt11	His tRNA
SE1060	284.805	0.000758454	SE1060	opp-2F protein
SE1837	276.728	0.00107463	SE1837	MarR family transcriptional regulator	https://www.ncbi.nlm.nih.gov/pmc/articles/PMC5487221/
SE0277	274.93	0.00601057	SE0277	bifunctional phosphoribosyl-AMP cyclohydrolase/phosphoribosyl-ATP pyrophosphatase protein
SE1561	268.702	0.00644086	SE1561	hypothetical protein
SE0044	265.575	0.0022091	SE0044	specificity determinant HsdS
SE0028	251.992	0.00168827	SE0028	hypothetical protein
SE0476	247.008	0.0082359	SE0476	hypothetical protein
SE1056	230.886	0.0105131	SE1056	hypothetical protein
SE2190	224.358	0.0111826	SE2190	hypothetical protein
SE2386	222.322	0.0043268	SE2386	hypothetical protein
SE0253	218.452	0.00264811	SE0253	dihydrolipoamide dehydrogenase
SE1444	214.379	0.0124538	SE1444	hypothetical protein
SE0119	212.06	0.00326419	SE0119	hypothetical protein
SE1430	210.689	0.0126456	SE1430	hypothetical protein
SE1228	208.822	6.60916e-07	SE1228	exogenous DNA-binding protein comGC
SE2218	196.704	0.0185213	SE2218	arginine repressor ArgR	Possibly related to switching to anearobic pathways
SE0574	195.179	0.0152516	SE0574	hypothetical protein
SE0649	184.942	0.00634027	SE0649	polyribonucleotide nucleotidyltransferase
SE1552	184.02	0.00644086	SE1552	A/G-specific adenine glycosylase
SE1643	181.408	0.00563447	SE1643	sucrose operon repressor
SE1564	180.366	0.00648555	SE1564	aminopeptidase
SE1264	165.71	0.00795545	SE1264	16S ribosomal RNA methyltransferase RsmE
SE1557	163.48	0.0255775	SE1557	hypothetical protein
SE1440	160.986	0.0278069	SE1440	riboflavin synthase subunit alpha
SE1864	156.202	0.0131716	SE1864	urease accessory protein UreE
SE1388	153.994	0.0093811	SE1388	hypothetical protein
SE0352	152.337	0.0278069	SE0352	hypothetical protein
SE0130	139.618	0.0333706	SE0130	hypothetical protein
SE1438	139.087	0.0341889	SE1438	6,7-dimethyl-8-ribityllumazine synthase
SE1717	137.562	0.0355787	SE1717	thymidine kinase
SE0285	135.985	0.0364337	SE0285	hypothetical protein
SE0942	132.082	0.0143404	SE0942	transcription elongation factor NusA
SE0068	130.688	0.0155443	SE0068	hypothetical protein
SE1665	125.271	0.0408977	SE1665	hypothetical protein
SE0929	111.405	0.0481791	SE0929	ATP-dependent protease peptidase subunit
SE1535	108.205	0.0276792	SE1535	hypothetical protein
SE0244	107.333	0.02248	SE0244	hypothetical protein
SE2337	105.804	0.0524593	SE2337	regulatory protein PfoR
SE0922	101.975	0.0552026	SE0922	ribonuclease HII
SE1297	101.699	0.0552026	SE1297	caffeoyl-CoA O-methyltransferase
SE2075	98.993	0.058297	SE2075	hypothetical protein
SE0069	90.167	0.068916	SE0069	hypothetical protein
SE2335	86.822	0.0725231	SE2335	hypothetical protein
SE0182	85.829	3.88091e-07	SE0182	6-carboxyhexanoate--CoA ligase
SE0219	83.839	0.0770669	SE0219	hypothetical protein
SE0928	78.982	0.0822996	SE0928	xerC protein
SE0022	77.15	0.0847282	SE0022	hypothetical protein
SE0181	70.987	5.85846e-15	SE0181	8-amino-7-oxononanoate synthase
SE0245	70.114	0.0549774	SE0245	triacylglycerol lipase
SE0275	69.982	0.0968926	SE0275	1-(5-phosphoribosyl)-5-[(5-phosphoribosylamino)methylideneamino] imidazole-4-carboxamide isomerase
SE1473	60.542	0.000412531	SE1473	hypothetical protein
SE1061	48.903	0.0953658	SE1061	oligopeptide transport ATPase
SE1029	48.274	0.0552026	SE1029	exonuclease SbcC
SE1574	46.763	1.1214e-42	SE1574	hypothetical protein
SE0180	39.658	4.11198e-10	SE0180	adenosylmethionine-8-amino-7-oxononanoate aminotransferase
SE2417	36.558	0.0426002	SE2417	tRNA modification GTPase TrmE
predicted339	36.162	3.37134e-13	predicted RNA	antisense: SEt11 SEt12 SEt10 SEt13 SEt14 SEt08 SEt09
SE0851	34.102	0.00053394	SE0851	hypothetical protein
SE0763	34.016	0.0773615	SE0763	phosphoribosylaminoimidazole carboxylase ATPase subunit
SE1617	33.49	0.0482988	SE1617	hypothetical protein
SE0223	32.289	4.20327e-05	SE0223	opuCB protein
SE0179	31.92	0.000405084	SE0179	dethiobiotin synthetase
predicted40	30.44	1.44559e-39	predicted RNA	antisense: SE0256 SE0255 SE0254 SE0253
SE0046	29.086	0.000741359	SE0046	spermidine acetyltransferase
SE2348	27.523	0.0180052	SE2348	inositol-monophosphate dehydrogenase
predicted506	27.333	3.17764e-31	predicted RNA	antisense: SE2228 SE2229
SE0254	26.115	0.00710274	SE0254	branched-chain alpha-keto acid dehydrogenase E1
SE2015	26.004	2.1961e-27	SE2015	opuCD protein
SE0844	25.861	0.00294962	SE0844	nucleoside-triphosphatase
SE1071	25.503	1.04337e-05	SE1071	hypothetical protein
SE2392	24.897	0.00170915	SE2392	ribosomal-protein-serine N-acetyltransferase
SE1244	23.135	8.17119e-06	SE1244	endonuclease IV
SE1668	22.145	0.00324569	SE1668	RNA polymerase sigma factor SigB
predicted337	21.158	4.66583e-24	predicted RNA	antisense: SE1469
SE0183	20.79	3.90598e-05	SE0183	hypothetical protein
SE0845	19.793	0.000267051	SE0845	hypothetical protein
SE1464	19.254	0.0223167	SE1464	O-succinylbenzoic acid-CoA ligase
SE1472	19.024	1.51813e-05	SE1472	integrase
SE1766	18.741	0.0146968	SE1766	ferrichrome ABC transporter
SE0598	18.727	0.0531973	SE0598	hypothetical protein
SE1087	17.577	0.00622186	SE1087	acylphosphatase
SE2310	16.893	1.68211e-14	SE2310	LysR family transcriptional regulator
SE2016	16.006	3.42707e-14	SE2016	glycine betaine/carnitine/choline ABC transporter opuCC
SE0627	15.713	4.81491e-11	SE0627	poly(glycerophosphate chain) D-alanine transfer protein
SE0306	15.222	0.0043268	SE0306	DNA-directed RNA polymerase subunit beta
SE0567	14.681	0.0825466	SE0567	hypothetical protein
SE0343	14.585	5.80906e-05	SE0343	indigoidine systhesis protein
SE0224	14.457	7.13278e-15	SE0224	glycine betaine/carnitine/choline ABC transporter opuCC
SE1136	14.35	0.0393112	SE1136	hypothetical protein
predicted338	14.348	1.75676e-24	predicted RNA	antisense: SE1469
SE2305	13.64	0.0671475	SE2305	recombination protein RecR
SE0065	13.611	0.000286285	SE0065	transposase
SE2327	13.467	0.0226949	SE2327	hypothetical protein
SE0924	13.137	0.00259199	SE0924	succinyl-CoA synthetase subunit alpha
predicted30	13.081	8.38782e-28	predicted RNA	antisense: SE0193
SE0192	12.959	0.0173043	SE0192	hypothetical protein
SE1567	12.722	2.64778e-06	SE1567	hypothetical protein
SE0389	11.974	7.3637e-10	SE0389	esterase/lipase
SE1461	11.852	4.87828e-05	SE1461	hypothetical protein
predicted36	11.813	1.14431e-21	predicted RNA	antisense: SE0241
SE2347	11.796	0.000262907	SE2347	GMP synthase
SE0342	11.584	0.00247416	SE0342	hypothetical protein
SE0777	11.476	0.036755	SE0777	hypothetical protein
SE1419	11.272	0.00675945	SE1419	hypothetical protein
SE0915	10.975	0.0264304	SE0915	tRNA (guanine-N(1)-)-methyltransferase
SE0683	10.785	0.060739	SE0683	oppF protein
SE1640	10.734	0.0393573	SE1640	sucrose-6-phosphate hydrolase
SE0222	10.699	0.0778399	SE0222	glycine betaine/carnitine/choline ABC transporter ATP-binding opuCA
SE0256	10.628	3.92382e-05	SE0256	branched-chain alpha-keto acid dehydrogenase subunit E2
SE0550	10.455	0.000309358	SE0550	hypothetical protein
predicted37	10.394	9.92918e-23	predicted RNA	antisense: SE0241
SE1291	10.27	0.0141577	SE1291	hypothetical protein
SE1540	9.781	0.0629693	SE1540	glutamate ABC transporter ATP-binding protein
SE1601	9.573	0.000109934	SE1601	pyrazinamidase/nicotinamidase-like protein
SE1460	9.463	4.09807e-12	SE1460	hypothetical protein
SE0451	9.393	0.00674019	SE0451	hypothetical protein
SE1626	9.203	0.0788077	SE1626	hypothetical protein
SE0388	8.931	0.0164237	SE0388	hypothetical protein
SE0238	8.756	0.036755	SE0238	phosphotransferase mannnose-specific family component IIA
SE0641	8.72	0.0385724	SE0641	monovalent cation/H+ antiporter subunit F
SE0341	8.501	0.00743354	SE0341	hexulose-6-phosphate synthase
SE0445	8.435	0.0759134	SE0445	hypothetical protein
SE1733	8.42	0.0152516	SE1733	hypothetical protein
SE1610	8.228	0.00294407	SE1610	hypothetical protein
SE0898	8.107	0.0043268	SE0898	hypothetical protein
SE1339	7.947	0.00622186	SE1339	valyl-tRNA synthetase
SE0064	7.926	1.93907e-07	SE0064	transposase
SE0247	7.507	0.0307595	SE0247	bicyclomycin resistance protein TcaB
predicted527	7.306	4.75767e-08	predicted RNA	-
SE0225	7.286	5.19822e-10	SE0225	opuCD protein
SE0437	7.102	0.0706061	SE0437	hypothetical protein
SE0536	7.097	0.0119072	SE0536	peptide chain release factor 2
SE0184	7.077	3.81998e-05	SE0184	staphopain,cysteine proteinase
SE1152	7.017	0.0299508	SE1152	hypothetical protein
SE2331	7.016	5.97963e-05	SE2331	hypothetical protein
SE0615	6.995	0.067806	SE0615	hypothetical protein
SE0358	6.888	1.79427e-05	SE0358	heme peroxidase
SE1145	6.877	0.0543756	SE1145	tRNA CCA-pyrophosphorylase
SE0702	6.838	0.000267876	SE0702	transposase
SE1390	6.79	0.00633947	SE1390	hypothetical protein
SE0577	6.752	2.5193e-12	SE0577	cation-efflux system membrane protein CzcD
SE0101	6.748	1.89316e-08	SE0101	transposase
SE1338	6.746	0.00117551	SE1338	folylpolyglutamate synthase
SE1363	6.738	0.0397578	SE1363	transposase
SE0136	6.698	0.0426002	SE0136	arsenical resistance operon repressor
SE0632	6.631	0.00505763	SE0632	NADH dehydrogenase
SE1227	6.493	0.0710972	SE1227	competence protein
SE0266	6.267	7.82476e-08	SE0266	malate:quinone oxidoreductase
SE1633	6.231	2.56801e-09	SE1633	hypothetical protein
SE1577	6.211	0.00548504	SE1577	UDP-N-acetylmuramyl tripeptide synthetase-like protein
SE0226	6.104	1.03069e-07	SE0226	tributyrin esterase
SE0813	5.999	0.00616239	SE0813	pyruvate carboxylase
SE0396	5.981	1.37205e-12	SE0396	hypothetical protein
SE0063	5.929	5.42393e-05	SE0063	transposase
predicted222	5.896	2.71489e-17	predicted RNA	antisense: SE0979
SE0848	5.893	7.06051e-05	SE0848	phenol soluble modulin beta 1/beta 2
SE2125	5.826	0.00549027	SE2125	acyltransferase
SE0710	5.774	0.0344381	SE0710	recombinase Sin
predicted32	5.747	8.03626e-16	predicted RNA	antisense: SE0227
SE1661	5.714	1.78709e-05	SE1661	isopropylmalate isomerase small subunit
SE0152	5.663	0.00185954	SE0152	hypothetical protein
SE0644	5.653	0.0568969	SE0644	monovalent cation/H+ antiporter subunit C
SE0456	5.647	4.08568e-05	SE0456	ABC transporter
SE1572	5.567	0.0876836	SE1572	hypothetical protein
SE1008	5.541	2.69873e-07	SE1008	aspartate kinase
SE1381	5.453	3.10103e-09	SE1381	hypothetical protein
SE1662	5.446	8.2516e-05	SE1662	threonine dehydratase
SE1760	5.431	0.0142545	SE1760	hemolysin III
SE0847	5.428	8.93386e-06	SE0847	hypothetical protein
SE2017	5.428	0.00783622	SE2017	opuCB protein
SE0585	5.418	7.58076e-13	SE0585	hypothetical protein
SE0395	5.403	1.8012e-06	SE0395	hypothetical protein
SE1659	5.357	0.00531508	SE1659	3-isopropylmalate dehydrogenase
SE1263	5.316	0.000117939	SE1263	hypothetical protein
SE1172	5.313	8.8531e-06	SE1172	ferredoxin
SE1309	5.304	1.3367e-07	SE1309	recombination factor protein RarA
predicted360	5.243	1.60428e-14	predicted RNA	antisense: SE1573
SE1002	5.228	3.43643e-05	SE1002	two-component response regulator
SE1511	5.226	0.0560565	SE1511	protoporphyrinogen oxidase
predicted206	5.201	2.48024e-11	predicted RNA	antisense: nusA SE0941
predicted33	5.195	7.95409e-14	predicted RNA	antisense: SE0227 SE0229 SE0228
SE0582	5.115	4.28562e-05	SE0582	hypothetical protein
SE0197	5.091	0.00352241	SE0197	acetoin(diacetyl)reductase
SE1691	5.012	0.0772439	SE1691	hydroxyethylthiazole kinase
SE1765	4.996	1.36328e-08	SE1765	hypothetical protein
SE0784	4.976	0.0369413	SE0784	cytochrome d ubiquinol oxidase subunit 1-like protein
SE0501	4.967	0.0890075	SE0501	ATP-dependent DNA helicase RecQ
SE0267	4.964	0.000318041	SE0267	hypothetical protein
SE1471	4.964	0.0525627	SE1471	hypothetical protein
SE1995	4.886	0.000244576	SE1995	phosphoglyceromutase
SE1876	4.848	6.71243e-11	SE1876	secretory antigen SsaA
SE2182	4.806	5.02277e-05	SE2182	hypothetical protein
SE1549	4.796	0.00455338	SE1549	hypothetical protein
SE0571	4.775	0.00836143	SE0571	Na+-transporting ATP synthase
SE2332	4.71	0.00834006	SE2332	hypothetical protein
SE1660	4.709	0.0018162	SE1660	isopropylmalate isomerase large subunit
SE0612	4.704	0.0549663	SE0612	hypothetical protein
predicted207	4.672	1.07261e-11	predicted RNA	antisense: nusA
SE2366	4.655	0.0737551	SE2366	hypothetical protein
SE1893	4.641	0.00558829	SE1893	hypothetical protein
SE1322	4.631	0.0642786	SE1322	queuine tRNA-ribosyltransferase
SE1220	4.599	0.00427005	SE1220	glycine dehydrogenase subunit 2
SE1519	4.589	0.00799243	SE1519	hypothetical protein
SE1715	4.586	0.0315157	SE1715	protoporphyrinogen oxidase
predicted238	4.548	3.99201e-09	predicted RNA	antisense: sucA SE1096
SE0846	4.511	0.000157933	SE0846	hypothetical protein
SE0307	4.483	0.0152873	SE0307	DNA-directed RNA polymerase subunit beta'
SE0617	4.426	0.0522473	SE0617	lipoyl synthase
SE1141	4.378	0.0340649	SE1141	chromosome replication initiation protein dnaD
SE0067	4.296	0.00234641	SE0067	transposase
SE0637	4.294	0.0118412	SE0637	hypothetical protein
SE1875	4.277	2.57271e-07	SE1875	hypothetical protein
SE1445	4.257	0.00630552	SE1445	hypothetical protein
SE2069	4.254	0.0816218	SE2069	hypothetical protein
predicted433	4.249	3.26273e-11	predicted RNA	antisense: SE1974 SE1973 SE1975
SE1096	4.247	0.000860075	SE1096	dihydrolipoamide succinyltransferase
SE2068	4.245	0.000267876	SE2068	Zn-binding lipoprotein adcA
SE2031	4.228	0.00964014	SE2031	hypothetical protein
SE0587	4.208	0.000344982	SE0587	phosphoglycerate mutase
predicted411	4.156	1.23729e-05	predicted RNA	antisense: SE1897
SE2230	4.11	0.0193116	SE2230	phage infection protein
SE0132	4.1	6.77516e-05	SE0132	hypothetical protein
SE0601	4.057	0.0642786	SE0601	hypothetical protein
SE1308	4.02	0.0119866	SE1308	hypothetical protein
SE1877	3.988	5.05758e-07	SE1877	SMR-type multidrug efflux transporter
SE2221	3.987	0.00674019	SE2221	hypothetical protein
SE1635	3.979	2.14856e-06	SE1635	accessory gene regulator B
SE1361	3.965	0.0984783	SE1361	glyceraldehyde 3-phosphate dehydrogenase 2
predicted23	3.955	5.6006e-05	predicted RNA	antisense: SE0110
SE1336	3.934	0.0011118	SE1336	DNA repair protein RadC-like protein
SE0406	3.914	0.0439527	SE0406	hypothetical protein
SE1554	3.91	0.0565971	SE1554	teichoic acid transport protein tagG
SE2334	3.908	7.86714e-07	SE2334	hypothetical protein
SE0817	3.868	0.0779573	SE0817	hypothetical protein
SE1243	3.864	0.02248	SE1243	ABC transporter ATP-binding protein
predicted435	3.863	2.50514e-09	predicted RNA	antisense: SE1975
SE0624	3.854	0.000569481	SE0624	D-alanine--poly(phosphoribitol) ligase subunit 1
SE0201	3.841	0.0367482	SE0201	diaminopimelate epimerase
SE1896	3.839	0.0220172	SE1896	hypothetical protein
SE0737	3.826	0.000582953	SE0737	hypothetical protein
SE1218	3.82	0.0131719	SE1218	hypothetical protein
predicted159	3.783	0.0073219	predicted RNA	antisense: SE0772 SE0770 SE0769 SE0768 purH
predicted226	3.764	9.69086e-06	predicted RNA	antisense: SE1007
SE0645	3.764	0.00615281	SE0645	monovalent cation/H+ antiporter subunit B
SE1582	3.746	0.036017	SE1582	RNA methyltransferase-like protein
SE0424	3.72	6.06005e-05	SE0424	lipase LipA
predicted273	3.714	1.65505e-08	predicted RNA	antisense: SE1243
SE0455	3.71	0.0225446	SE0455	hypothetical protein
predicted374	3.703	2.46743e-14	predicted RNA	antisense: SE1635 SE1637 SE1636
SE2222	3.666	0.0639165	SE2222	hypothetical protein
SE1850	3.659	0.0255498	SE1850	molybdenum transport ATP-binding protein ModC
SE1108	3.646	0.015905	SE1108	multiple sugar-binding transport ATP-binding protein
SE1022	3.642	0.0026189	SE1022	lexa repressor
SE0838	3.622	0.0101729	SE0838	thioredoxin
SE0636	3.618	0.00341772	SE0636	leucyl aminopeptidase
SE1337	3.585	0.000773354	SE1337	type IV prepilin peptidase
predicted434	3.556	4.35779e-08	predicted RNA	antisense: SE1975
predicted436	3.555	4.66802e-08	predicted RNA	antisense: SE1975
predicted370	3.542	0.0099251	predicted RNA	antisense: SE1621
SE1470	3.526	0.00137019	SE1470	phage phi PVL amidase
SE1384	3.514	0.00255514	SE1384	alanine dehydrogenase
SE1946	3.506	1.38066e-07	SE1946	hypothetical protein
SE2129	3.456	0.0890075	SE2129	regulatory protein
SE0625	3.411	0.000913026	SE0625	DltB membrane protein
SE1107	3.392	0.00302365	SE1107	maltose ABC transporter permease
SE1229	3.378	0.00115508	SE1229	DNA transport machinery protein comGB
predicted275	3.373	2.31014e-07	predicted RNA	antisense: SE1243
SE0450	3.371	0.00318421	SE0450	hypothetical protein
predicted35	3.366	3.39301e-09	predicted RNA	antisense: gldA SE0236 SE0238 SE0237
predicted432	3.362	1.60628e-08	predicted RNA	antisense: SE1972 SE1971 SE1973 SE1970 SE1969
SE0551	3.348	0.0779573	SE0551	ATP-dependent Clp protease proteolytic subunit
SE1422	3.333	0.0287004	SE1422	hypothetical protein
SE1191	3.33	0.00752979	SE1191	alpha-D-1,4-glucosidase
SE1747	3.328	0.000758454	SE1747	czrB protein
predicted509	3.29	0.00313893	predicted RNA	antisense: SEt55 SEt56 SEt54 SEt59 SEt57 SEt58
SE1828	3.261	0.0834762	SE1828	DNA topoisomerase III
predicted109	3.25	2.10085e-06	predicted RNA	antisense: SE0584
SE1636	3.245	0.00365489	SE1636	AgrD protein
SE1872	3.228	0.0011118	SE1872	ssaA protein
SE1531	3.225	0.00424315	SE1531	hypothetical protein
SE2224	3.223	0.0158213	SE2224	hypothetical protein
SE1566	3.222	0.0043268	SE1566	protein-tyrosine-phosphatase
SE1832	3.19	0.0449444	SE1832	hypothetical protein
SE1364	3.171	0.00365489	SE1364	hypothetical protein
SE2047	3.156	0.00885628	SE2047	glycerol-3-phosphate transporter
SE2124	3.149	0.00059419	SE2124	ssaA protein
SE2235	3.149	0.0160988	SE2235	transposase
SE1789	3.144	0.00135973	SE1789	NAD-dependent deacetylase
SE1217	3.137	0.000796274	SE1217	hypothetical protein
SE1634	3.108	0.000476197	SE1634	delta-hemolysin
SE0804	3.096	0.0177698	SE0804	hypothetical protein
SE1421	3.074	0.0355098	SE1421	tRNA (guanine-N(7)-)-methyltransferase
SE1408	3.071	0.00461009	SE1408	formate--tetrahydrofolate ligase
SE1689	3.049	0.00601691	SE1689	lipoprotein
predicted460	3.044	5.73605e-06	predicted RNA	antisense: SE2067
predicted64	3.027	9.54525e-05	predicted RNA	antisense: SE0378
SE0393	3.023	0.000360004	SE0393	hypothetical protein
SE1428	3.012	0.0953658	SE1428	hypothetical protein
SE1580	2.99	0.000470753	SE1580	DNA polymerase IV
SE1780	2.953	0.026967	SE1780	hypothetical protein
SE1772	2.932	0.000583087	SE1772	hypothetical protein
SE0496	2.928	0.00085812	SE0496	hypothetical protein
SE0038	2.927	0.0822996	SE0038	hypothetical protein
SE1581	2.919	0.0326301	SE1581	hypothetical protein
SE0365	2.918	0.0210133	SE0365	mercuric reductase-like protein
SE1620	2.908	0.0103259	SE1620	hypothetical protein
SE1568	2.851	0.000501504	SE1568	transporter
SE1306	2.84	0.00089573	SE1306	hypothetical protein
SE0576	2.838	0.019077	SE0576	hypothetical protein
SE0750	2.828	0.0166043	SE0750	N-acetylmuramoyl-L-alanine amidase
SE1578	2.826	0.0141473	SE1578	ferritin
SE1721	2.825	0.000902567	SE1721	transposase
SE1239	2.814	0.0122695	SE1239	hypothetical protein
SE0803	2.813	0.0010281	SE0803	manganese transport protein MntH
SE2388	2.794	0.0099251	SE2388	ABC transporter ATP-binding protein
SE0647	2.789	0.00644086	SE0647	hypothetical protein
predicted274	2.779	3.90028e-06	predicted RNA	antisense: SE1243
SE0783	2.77	0.0648242	SE0783	hypothetical protein
SE1167	2.758	0.000257653	SE1167	L-asparaginase
SE1569	2.756	0.0907938	SE1569	two-component response regulator
predicted441	2.755	2.81261e-07	predicted RNA	antisense: SE2013 SE2014
SE1918	2.742	0.0781662	SE1918	hypothetical protein
predicted473	2.726	3.533e-06	predicted RNA	antisense: SE2103 SE2104
SE0076	2.725	0.0002553	SE0076	transposase
predicted208	2.72	1.19747e-05	predicted RNA	antisense: infB
SE0864	2.719	0.0158748	SE0864	hypothetical protein
SE0667	2.711	0.00130632	SE0667	transposase
SE0655	2.71	0.00089573	SE0655	glycerophosphoryl diester phosphodiesterase
SE1785	2.707	0.0864345	SE1785	tagatose-6-phosphate kinase
SE1831	2.705	0.0422705	SE1831	hypothetical protein
SE1737	2.704	0.000857591	SE1737	purine nucleoside phosphorylase
SE0628	2.704	0.00133257	SE0628	hypothetical protein
SE0282	2.699	0.00121911	SE0282	tansposase
SE2173	2.698	0.0552026	SE2173	hypothetical protein
SE1154	2.693	0.00810344	SE1154	3-dehydroquinate synthase
SE2066	2.689	0.0143404	SE2066	hypothetical protein
SE1900	2.686	0.00142068	SE1900	transposase
SE1932	2.681	0.0913389	SE1932	multidrug resistance protein
predicted126	2.68	3.43643e-05	predicted RNA	antisense: SE0624
SE1517	2.674	0.0315157	SE1517	ABC transporter ecsA-like protein
predicted528	2.67	3.2914e-05	predicted RNA	antisense: SE2336
SE0133	2.645	0.0293175	SE0133	hypothetical protein
SE2079	2.64	0.00181999	SE2079	transposase
SE0687	2.627	0.00194516	SE0687	hypothetical protein
SE0646	2.623	0.00714394	SE0646	monovalent cation/H+ antiporter subunit A
SE2260	2.612	0.00186764	SE2260	hypothetical protein
SE1576	2.605	0.072305	SE1576	cobyric acid synthase CobQ
SE1058	2.595	0.00304653	SE1058	FemB protein
SE0656	2.576	0.0029449	SE0656	argininosuccinate lyase
SE1185	2.562	0.008192	SE1185	oxidoreductase
SE0051	2.56	0.00224986	SE0051	hypothetical protein
SE1153	2.548	0.0108317	SE1153	3-phosphoshikimate 1-carboxyvinyltransferase
SE2062	2.534	0.0657606	SE2062	alkaline phosphatase
predicted349	2.53	0.000173728	predicted RNA	antisense: SE1542
SE0674	2.516	0.0898766	SE0674	clpB protein
SE1573	2.462	0.0984783	SE1573	methionine aminopeptidase
SE0268	2.461	0.0255775	SE0268	hypothetical protein
SE1690	2.46	0.0402688	SE1690	thiamine-phosphate pyrophosphorylase
SE0592	2.455	0.0323859	SE0592	3-dehydroquinate dehydratase
predicted459	2.438	0.000437799	predicted RNA	antisense: SE2067
SE2416	2.433	0.0455757	SE2416	tRNA uridine 5-carboxymethylaminomethyl modification enzyme GidA
SE1631	2.427	0.0131716	SE1631	hypothetical protein
SE0983	2.426	0.0340691	SE0983	glutathione peroxidase
SE1571	2.412	0.0364854	SE1571	hypothetical protein
SE1983	2.409	0.00436131	SE1983	transposase
SE1208	2.403	0.0220049	SE1208	acetyl-CoA carboxylase biotin carboxyl carrier subunit
SE1385	2.396	0.0570349	SE1385	hypothetical protein
SE2107	2.37	0.00795545	SE2107	hypothetical protein
SE1020	2.361	0.028696	SE1020	hypothetical protein
SE0675	2.356	0.00667452	SE0675	hypothetical protein
predicted209	2.348	0.000334972	predicted RNA	antisense: infB
SE0082	2.336	0.0678282	SE0082	hypothetical protein
predicted160	2.334	1.4047e-05	predicted RNA	antisense: SE0776
SE0849	2.333	0.0156608	SE0849	phenol soluble modulin beta 1/beta 2
SE0438	2.325	0.0371509	SE0438	hypothetical protein
predicted38	2.323	0.00317731	predicted RNA	antisense: SE0244
SE0618	2.317	0.0144429	SE0618	hypothetical protein
SE1409	2.312	0.0517822	SE1409	catabolite control protein A
SE0339	2.306	0.0436853	SE0339	hypothetical protein
SE0315	2.284	0.0781662	SE0315	ornithine cyclodeaminase
SE2400	2.283	0.0463684	SE2400	vraD protein
SE0586	2.276	0.0107987	SE0586	hypothetical protein
SE0981	2.19	0.0610319	SE0981	tRNA delta(2)-isopentenylpyrophosphate transferase
SE1696	2.188	0.0339071	SE1696	hypothetical protein
SE1926	2.168	0.0440924	SE1926	divalent cation transport
SE1579	2.138	0.0303307	SE1579	DNA polymerase III subunit alpha PolC-type
SE1968	2.135	0.0986016	SE1968	nitrite extrusion protein
SE1455	2.133	0.0188339	SE1455	transposase
SE0497	2.098	0.0369413	SE0497	hypothetical protein
SE2108	2.088	0.00304568	SE2108	secretory antigen SsaA
SE1184	2.072	0.0956427	SE1184	hypothetical protein
SE2034	2.069	0.0338664	SE2034	polyphosphate kinase
SE1749	2.06	0.0926083	SE1749	lytic regulatory protein
SE1401	2.056	0.0983194	SE1401	D-3-phosphoglycerate dehydrogenase
predicted378	2.029	0.00199572	predicted RNA	antisense: SE1670 SE1669
SE1917	2.017	0.0984783	SE1917	hypothetical protein

## Sheet: 334 significantly downregulated
Table S2: Genes significantly downregulated with 1% oat under aerobic conditions in S. epidermidis
Symbol	FC (Treatment/Aerobic)	FDR	Synonym	Gene product
SE1605	0.002	1.34064e-05	SE1605	hypothetical protein
predicted87	0.003	2.2801e-77	predicted RNA	antisense: SE0481
predicted426	0.003	1.93695e-66	predicted RNA	-
SE0907	0.003	0.00217323	SE0907	acyl carrier protein
SE2049	0.003	0.00222777	SE2049	hypothetical protein
SE1319	0.004	0.00742604	SE1319	transposase
SE0417	0.004	0.00779235	SE0417	hypothetical protein
SE1705	0.004	0.00821454	SE1705	ATP synthase F0F1 subunit C
SE1454	0.004	0.0103508	SE1454	transposase
SE1663	0.004	0.0107419	SE1663	hypothetical protein
SE0906	0.005	0.00294962	SE0906	3-oxoacyl-ACP reductase
SE1825	0.005	0.00471124	SE1825	30S ribosomal protein S10
SE0555	0.005	0.0153771	SE0555	hypothetical protein
SE0031	0.006	0.00795545	SE0031	hypothetical protein
SE0128	0.006	0.0211983	SE0128	hypothetical protein
predicted535	0.008	1.09976e-30	predicted RNA	antisense: SE2382
SE2241	0.008	0.0185117	SE2241	hypothetical protein
SE2052	0.008	0.0234839	SE2052	GTP-pyrophosphokinase
SE1332	0.009	0.0225693	SE1332	rod shape-determining protein MreC
predicted86	0.011	2.45839e-56	predicted RNA	antisense: SE0478 SE0480 SE0479
SE0249	0.013	0.0890795	SE0249	hypothetical protein
predicted536	0.015	8.30866e-41	predicted RNA	antisense: SE2382
predicted68	0.016	2.01473e-38	predicted RNA	antisense: SE0407 SE0406 SE0405
predicted89	0.024	1.03453e-28	predicted RNA	antisense: SE0506
SE1699	0.027	0.000463079	SE1699	ATP synthase F0F1 subunit epsilon
predicted67	0.035	5.89405e-54	predicted RNA	-
predicted428	0.051	8.38782e-28	predicted RNA	antisense: SE1963
predicted504	0.054	5.79282e-24	predicted RNA	antisense: SE2219
SE1526	0.055	0.0899311	SE1526	hypothetical protein
SE0348	0.056	7.04912e-32	SE0348	hypothetical protein
predicted284	0.056	5.45943e-20	predicted RNA	antisense: rpsT
predicted372	0.058	3.73551e-28	predicted RNA	antisense: groES
predicted503	0.06	4.28772e-19	predicted RNA	antisense: SE2219
predicted502	0.061	2.51246e-20	predicted RNA	antisense: SE2219
predicted499	0.062	1.7479e-25	predicted RNA	antisense: SE2200
SE0658	0.066	0.034528	SE0658	glucose-6-phosphate isomerase
SE0110	0.072	0.0484666	SE0110	hypothetical protein
predicted385	0.079	8.2428e-28	predicted RNA	antisense: SE1723
SE0419	0.083	0.0166305	SE0419	pyrimidine nucleoside transporter
SE2078	0.085	0.0201374	SE2078	transposase
predicted342	0.089	1.48284e-17	predicted RNA	antisense: SE1521
predicted343	0.09	1.88741e-15	predicted RNA	antisense: SE1521
predicted34	0.092	3.15559e-33	predicted RNA	antisense: SE0232
SE1160	0.097	0.0307276	SE1160	DNA-binding protein II
predicted185	0.099	1.92872e-20	predicted RNA	antisense: carB
predicted187	0.1	2.50906e-21	predicted RNA	antisense: carB SE0882 SE0880 pyrE
predicted485	0.1	3.32363e-19	predicted RNA	antisense: SE2156 SE2155
predicted347	0.106	5.15528e-19	predicted RNA	antisense: SE1526
predicted224	0.108	4.84827e-24	predicted RNA	antisense: SE0986 SE0987
predicted277	0.109	6.96822e-23	predicted RNA	antisense: SE1252
predicted371	0.11	2.07686e-22	predicted RNA	antisense: groEL
predicted425	0.111	2.30979e-19	predicted RNA	antisense: SE1952 SE1951
predicted90	0.112	2.73718e-12	predicted RNA	antisense: SE0509
SE0106	0.114	2.4376e-18	SE0106	arginine deiminase
predicted186	0.115	1.18269e-13	predicted RNA	antisense: carB
SE0986	0.118	0.0124758	SE0986	glutamine synthetase repressor
SE0232	0.118	0.0150553	SE0232	hypothetical protein
predicted320	0.122	6.74299e-22	predicted RNA	antisense: SE1405
predicted177	0.123	4.26141e-18	predicted RNA	antisense: SE0856 SE0855
predicted447	0.125	8.22779e-24	predicted RNA	antisense: SE2029
SE0347	0.126	1.2524e-16	SE0347	hypothetical protein
predicted280	0.127	2.54009e-24	predicted RNA	antisense: SE1259 SE1260 SE1261
predicted250	0.127	4.66212e-16	predicted RNA	antisense: SE1160
SE0833	0.131	2.05615e-06	SE0833	ribonuclease HIII
predicted70	0.133	1.16731e-14	predicted RNA	-
predicted59	0.137	4.39479e-17	predicted RNA	-
predicted193	0.138	7.11179e-15	predicted RNA	antisense: SE0906 acpP
predicted168	0.138	2.01367e-14	predicted RNA	antisense: SE0803
predicted235	0.139	2.55247e-25	predicted RNA	antisense: SE1086
predicted243	0.139	1.05908e-19	predicted RNA	-
SE2101	0.144	0.0006966	SE2101	PTS enzyme II glucose-specific transporter subunit factor IIABC
predicted77	0.148	8.68129e-14	predicted RNA	antisense: SE0432
SE0176	0.151	2.90678e-10	SE0176	hypothetical protein
predicted150	0.155	4.89516e-20	predicted RNA	antisense: SE0729
predicted440	0.158	1.63381e-18	predicted RNA	antisense: SE2000 SE1999
predicted189	0.16	9.25749e-10	predicted RNA	antisense: SE0889
predicted169	0.162	4.27984e-15	predicted RNA	antisense: SE0804
predicted41	0.165	2.06522e-06	predicted RNA	-
SE1909	0.166	1.36733e-08	SE1909	hypothetical protein
predicted71	0.169	3.01773e-15	predicted RNA	antisense: SE0415
SE0346	0.17	1.83904e-10	SE0346	acetyl-CoA c-acetyltransferase
predicted137	0.171	1.83265e-14	predicted RNA	antisense: SE0665
SE2156	0.171	0.000147457	SE2156	fructose-1,6-bisphosphate aldolase
predicted215	0.173	3.72037e-13	predicted RNA	antisense: SE0960
predicted184	0.179	1.36044e-14	predicted RNA	antisense: carB pyrC SE0878
predicted165	0.179	3.41488e-13	predicted RNA	antisense: def
SE2361	0.181	3.39301e-09	SE2361	hypothetical protein
SE2077	0.182	1.73306e-08	SE2077	N-acetyltransferase
predicted261	0.184	3.04072e-10	predicted RNA	antisense: SE1192
predicted176	0.186	2.7825e-14	predicted RNA	antisense: mraW SE0853 SE0855
SE0889	0.187	2.22056e-07	SE0889	hypothetical protein
SE0557	0.187	0.00731524	SE0557	glyceraldehyde-3-phosphate dehydrogenase
predicted136	0.188	2.0706e-12	predicted RNA	antisense: pgi
SE0639	0.189	0.000220811	SE0639	hypothetical protein
SE0558	0.194	0.00173105	SE0558	phosphoglycerate kinase
predicted484	0.196	1.91924e-16	predicted RNA	antisense: SE2145 SE2143 SE2144
predicted351	0.197	2.38336e-12	predicted RNA	antisense: SEt15 SEt16
SE2359	0.198	2.33588e-10	SE2359	hypothetical protein
predicted454	0.2	3.36068e-07	predicted RNA	antisense: SE2055
SE0853	0.2	0.0114558	SE0853	cell division protein MraZ
SE1963	0.204	0.0846885	SE1963	hypothetical protein
predicted42	0.205	6.51732e-09	predicted RNA	antisense: SE0268
predicted57	0.206	6.40871e-08	predicted RNA	antisense: SE0318
SE2391	0.207	6.63414e-07	SE2391	hypothetical protein
predicted260	0.208	3.17624e-07	predicted RNA	antisense: SE1192
SE0810	0.209	0.0418524	SE0810	hypothetical protein
predicted415	0.21	1.67124e-11	predicted RNA	antisense: SE1908
predicted28	0.21	9.65213e-09	predicted RNA	antisense: SE0175
predicted420	0.21	0.0014807	predicted RNA	antisense: SE1940
predicted412	0.211	3.2399e-11	predicted RNA	antisense: SE1901
predicted247	0.212	5.32242e-15	predicted RNA	antisense: SE1149 SE1148
predicted529	0.213	2.56458e-09	predicted RNA	antisense: guaA
predicted281	0.214	2.81973e-08	predicted RNA	antisense: rpsU
SE0532	0.214	0.0930297	SE0532	competence protein ComF
predicted309	0.216	7.93063e-13	predicted RNA	antisense: SE1373 pfkA
predicted318	0.216	5.77495e-11	predicted RNA	antisense: SE1393
predicted317	0.217	3.37572e-10	predicted RNA	antisense: SE1393
predicted29	0.218	4.06121e-07	predicted RNA	antisense: SE0175
SE0175	0.219	6.93516e-06	SE0175	accumulation-associated protein
predicted192	0.223	1.77567e-08	predicted RNA	antisense: SE0905
predicted479	0.225	3.61919e-10	predicted RNA	antisense: SE2120
SE2028	0.225	7.78835e-07	SE2028	glutamate synthase
SE0604	0.228	0.000869328	SE0604	hypothetical protein
SE0560	0.228	0.00261345	SE0560	phosphoglyceromutase
predicted233	0.229	1.38835e-10	predicted RNA	antisense: SE1045
predicted76	0.229	3.6621e-08	predicted RNA	antisense: SE0432
predicted101	0.232	1.76102e-14	predicted RNA	antisense: tpiA SE0560 pgk eno SE0557 SE0556
SE0534	0.232	0.0156608	SE0534	hypothetical protein
predicted265	0.233	1.92331e-09	predicted RNA	antisense: SE1213 SE1214
predicted464	0.233	5.47713e-07	predicted RNA	antisense: SE2073
SE1960	0.233	3.24432e-06	SE1960	hypothetical protein
SE2152	0.236	0.0642786	SE2152	hypothetical protein
predicted94	0.237	9.98334e-11	predicted RNA	antisense: SE0519 murB
SE1928	0.238	4.66802e-08	SE1928	hypothetical protein
predicted401	0.239	3.24432e-06	predicted RNA	antisense: ureB ureC ureA
SE0559	0.239	0.0010281	SE0559	triosephosphate isomerase
predicted69	0.24	4.546e-11	predicted RNA	antisense: SE0408
predicted152	0.241	1.84481e-10	predicted RNA	antisense: SE0750
SE2051	0.241	0.00558422	SE2051	hypothetical protein
SE2144	0.245	0.022712	SE2144	acetolactate synthase
predicted362	0.246	1.87917e-08	predicted RNA	antisense: gatB
SE0530	0.247	0.000220811	SE0530	hypothetical protein
predicted336	0.248	1.23131e-09	predicted RNA	antisense: SE1458
predicted486	0.25	4.85222e-10	predicted RNA	antisense: SE2158
SE1990	0.252	0.0956427	SE1990	transposase
predicted242	0.253	1.15923e-08	predicted RNA	antisense: SE1132
predicted26	0.254	2.17744e-07	predicted RNA	antisense: SE0160
predicted526	0.255	1.87085e-10	predicted RNA	antisense: SE2330
SE2363	0.259	2.50947e-07	SE2363	hypothetical protein
predicted182	0.262	4.96146e-10	predicted RNA	antisense: pyrC
predicted111	0.262	1.82105e-09	predicted RNA	antisense: SE0596
predicted183	0.263	9.53581e-10	predicted RNA	antisense: pyrC
predicted363	0.263	8.4023e-08	predicted RNA	antisense: gatB
predicted228	0.263	1.53733e-07	predicted RNA	antisense: SE1025
predicted153	0.264	2.39531e-08	predicted RNA	antisense: SE0750
predicted419	0.264	0.00461009	predicted RNA	antisense: SE1939
predicted225	0.267	3.4463e-06	predicted RNA	antisense: SE0997
predicted54	0.269	4.97251e-06	predicted RNA	antisense: SE0302 rplJ rplL
predicted470	0.27	4.13133e-08	predicted RNA	antisense: SE2097
SE1447	0.271	0.000756553	SE1447	hypothetical protein
SE1934	0.271	0.0816218	SE1934	transcriptional regulator
predicted290	0.272	3.27448e-07	predicted RNA	antisense: tgt SE1321
predicted418	0.272	0.00158287	predicted RNA	antisense: SE1939
predicted410	0.275	4.95383e-05	predicted RNA	antisense: murQ SE1891 SE1890 SE1888
predicted423	0.275	7.19073e-05	predicted RNA	antisense: SE1948
SE1738	0.275	0.0496291	SE1738	general stress protein 20U
SE0261	0.277	7.93112e-06	SE0261	pyrrolidone-carboxylate peptidase
predicted197	0.285	2.01752e-06	predicted RNA	antisense: rplS
predicted178	0.29	2.63523e-08	predicted RNA	antisense: SE0861 SE0860
predicted27	0.29	1.81016e-05	predicted RNA	-
SE1609	0.295	0.00123037	SE1609	hypothetical protein
predicted8	0.301	2.6058e-05	predicted RNA	antisense: SE0007
predicted474	0.305	1.88875e-09	predicted RNA	antisense: SE2107
predicted364	0.305	1.20203e-05	predicted RNA	antisense: gatA gatB
predicted319	0.31	5.83298e-07	predicted RNA	antisense: SE1404
SE2099	0.31	0.0122273	SE2099	hypothetical protein
predicted204	0.311	6.89682e-07	predicted RNA	antisense: frr pyrH
predicted523	0.313	8.57605e-09	predicted RNA	antisense: SE2300
SE0409	0.314	1.03486e-05	SE0409	hypothetical protein
predicted329	0.318	1.81474e-05	predicted RNA	antisense: SE1423
predicted402	0.318	0.00185585	predicted RNA	antisense: ureE ureC SE1865
predicted325	0.319	1.73703e-06	predicted RNA	antisense: murC
predicted75	0.32	1.05426e-05	predicted RNA	antisense: SE0431
SE1915	0.32	2.31415e-05	SE1915	hypothetical protein
predicted400	0.321	6.26357e-05	predicted RNA	antisense: SE1840
SE2390	0.321	0.00214237	SE2390	hypothetical protein
predicted365	0.322	5.80906e-05	predicted RNA	antisense: gatA
predicted181	0.324	9.50577e-07	predicted RNA	antisense: pyrB pyrC
SE1919	0.327	9.74578e-05	SE1919	DNA-3-methyladenine glycosidase
predicted213	0.329	1.0693e-06	predicted RNA	antisense: SE0951
predicted72	0.33	5.30201e-05	predicted RNA	antisense: SE0418
predicted143	0.331	5.74398e-06	predicted RNA	antisense: SE0690
predicted406	0.331	0.00158287	predicted RNA	antisense: SE1867
SE1922	0.334	0.000237829	SE1922	hypothetical protein
predicted395	0.334	0.00155336	predicted RNA	antisense: SE1763
SE0510	0.336	0.0953658	SE0510	7-cyano-7-deazaguanine reductase
SE2042	0.338	0.0115617	SE2042	phosphomannomutase
predicted246	0.339	0.000221887	predicted RNA	antisense: recU SE1138
predicted424	0.341	0.000105723	predicted RNA	antisense: SE1950
predicted252	0.342	3.48155e-06	predicted RNA	antisense: SE1165 SE1164
predicted205	0.342	3.72743e-05	predicted RNA	antisense: SE0939
predicted334	0.342	7.10632e-05	predicted RNA	antisense: SE1449
predicted505	0.343	1.4047e-05	predicted RNA	antisense: SE2225
predicted96	0.343	1.99024e-05	predicted RNA	antisense: SE0534
SE0671	0.344	2.66893e-05	SE0671	hypothetical protein
SE1394	0.345	0.0021481	SE1394	hypothetical protein
predicted404	0.347	0.00434261	predicted RNA	antisense: SE1866
predicted403	0.347	0.00713853	predicted RNA	antisense: SE1865
predicted172	0.349	9.12168e-05	predicted RNA	antisense: SE0813
predicted201	0.35	4.37067e-05	predicted RNA	antisense: SE0931
predicted163	0.355	5.03542e-05	predicted RNA	antisense: SE0782 SE0781
SE0755	0.355	0.0011118	SE0755	ribonucleoside hydrolase RihC
SE0159	0.355	0.00486849	SE0159	hypothetical protein
predicted203	0.357	5.0578e-06	predicted RNA	antisense: pyrH
SE0504	0.357	0.00164886	SE0504	histidinol-phosphate aminotransferase
SE1916	0.357	0.00189217	SE1916	hypothetical protein
SE0425	0.358	4.98809e-05	SE0425	hypothetical protein
SE2207	0.358	0.000193413	SE2207	hypothetical protein
predicted510	0.358	0.000304954	predicted RNA	antisense: SE2272
predicted108	0.36	2.5575e-06	predicted RNA	antisense: SE0578
predicted430	0.36	4.05934e-06	predicted RNA	antisense: SE1964
predicted405	0.36	0.00202135	predicted RNA	antisense: SE1867
predicted355	0.361	1.10309e-06	predicted RNA	antisense: SE1545
predicted200	0.364	8.44798e-05	predicted RNA	antisense: SE0931
SE1826	0.364	0.00317731	SE1826	hypothetical protein
predicted154	0.365	0.000159228	predicted RNA	antisense: SE0759 SE0758 SE0757 SE0756
predicted481	0.365	0.000358934	predicted RNA	antisense: SE2126
predicted316	0.369	3.15771e-05	predicted RNA	antisense: tpx
predicted142	0.369	6.47442e-05	predicted RNA	antisense: SE0690
SE0809	0.371	0.0148062	SE0809	transposase
predicted472	0.373	7.63923e-06	predicted RNA	antisense: SE2101 SE2102
predicted380	0.373	0.00159282	predicted RNA	antisense: SE1708 SE1705 SE1704 SE1707 atpC SE1706 SE1701 SE1700 SE1703 SE1702
SE0089	0.373	0.0117116	SE0089	hypothetical protein
predicted346	0.376	9.85916e-05	predicted RNA	antisense: SE1523 SE1524
SE1913	0.377	0.00914431	SE1913	aldose 1-epimerase
predicted151	0.378	0.000324072	predicted RNA	antisense: SE0746
SE0258	0.378	0.0847282	SE0258	hypothetical protein
predicted308	0.379	9.11569e-06	predicted RNA	antisense: SE1372
predicted429	0.379	1.24721e-05	predicted RNA	antisense: SE1964
SE1910	0.379	0.00158287	SE1910	hypothetical protein
predicted439	0.38	2.49832e-06	predicted RNA	antisense: gpmA
predicted487	0.38	0.000192242	predicted RNA	antisense: SE2161
predicted512	0.381	2.01099e-05	predicted RNA	antisense: SE2282 SE2283
predicted525	0.383	4.09416e-05	predicted RNA	antisense: SE2319
predicted148	0.386	6.93516e-06	predicted RNA	antisense: SE0715
predicted289	0.386	0.000357025	predicted RNA	-
predicted522	0.387	2.31415e-05	predicted RNA	antisense: SE2298
predicted251	0.389	0.000357025	predicted RNA	antisense: SE1161
SE1121	0.389	0.0968926	SE1121	ABC transporter ATP-binding protein
SE1630	0.391	0.00669851	SE1630	co-chaperonin GroES
SE1262	0.393	0.0265239	SE1262	30S ribosomal protein S21
predicted245	0.396	0.000602375	predicted RNA	antisense: recU
predicted162	0.397	0.000831528	predicted RNA	antisense: SE0778
predicted56	0.397	0.00113632	predicted RNA	antisense: SE0311 SE0310 rpsL tuf SE0308
predicted345	0.398	0.000145413	predicted RNA	antisense: SE1523
predicted147	0.399	2.55432e-05	predicted RNA	antisense: SE0715
SE1994	0.399	0.020184	SE1994	hypothetical protein
SE1396	0.4	0.00619215	SE1396	30S ribosomal protein S4
SEt03	0.403	0.00202207	SEt03	Arg tRNA
predicted24	0.404	0.000408708	predicted RNA	antisense: SE0123
predicted287	0.407	2.31415e-05	predicted RNA	antisense: SE1300 SE1299 SE1298
predicted488	0.407	0.00115224	predicted RNA	antisense: SE2161
SE1399	0.41	0.0660906	SE1399	hypothetical protein
predicted521	0.412	0.000115848	predicted RNA	antisense: SE2297 SE2298
predicted99	0.412	0.00222631	predicted RNA	antisense: secA
predicted333	0.413	0.000279235	predicted RNA	antisense: SE1443
predicted431	0.413	0.000412531	predicted RNA	antisense: SE1967
predicted180	0.415	3.75141e-05	predicted RNA	antisense: SE0867 SE0866
predicted498	0.418	3.13284e-05	predicted RNA	antisense: SE2191
SE1223	0.419	0.000478303	SE1223	hypothetical protein
predicted239	0.42	0.000297202	predicted RNA	antisense: SE1114 SE1116 SE1115
predicted471	0.422	0.000213199	predicted RNA	antisense: SE2098
SE1556	0.422	0.000610844	SE1556	hypothetical protein
predicted359	0.423	0.000301725	predicted RNA	antisense: SE1567 SE1566
predicted139	0.423	0.00826475	predicted RNA	antisense: SE0676
SE0561	0.424	0.0289026	SE0561	phosphopyruvate hydratase
SE1899	0.424	0.0365028	SE1899	transposase
predicted331	0.425	0.000283572	predicted RNA	antisense: SE1437
SE0505	0.428	0.00384806	SE0505	hypothetical protein
SE1887	0.429	0.0126309	SE1887	hypothetical protein
SE2100	0.429	0.0739445	SE2100	hypothetical protein
predicted216	0.431	7.06051e-05	predicted RNA	antisense: recA
predicted285	0.431	0.00427005	predicted RNA	antisense: greA
SE2153	0.431	0.00653544	SE2153	transposase
predicted93	0.433	0.00421552	predicted RNA	antisense: SE0513
predicted271	0.434	0.000319437	predicted RNA	antisense: rpmG
SE1942	0.435	0.00713813	SE1942	two component histidine kinase sensor
SE2022	0.436	0.00638507	SE2022	para-nitrobenzyl esterase chain A
predicted97	0.439	0.00160327	predicted RNA	antisense: secA
SE0716	0.439	0.00714394	SE0716	multidrug resistance protein-like protein
predicted92	0.44	0.00446589	predicted RNA	antisense: SE0513
predicted2	0.441	0.000300311	predicted RNA	antisense: dnaA
predicted313	0.441	0.00218058	predicted RNA	antisense: SE1387
predicted98	0.441	0.00224986	predicted RNA	antisense: secA
predicted303	0.442	0.000400536	predicted RNA	antisense: thrS
predicted286	0.442	0.00589115	predicted RNA	antisense: greA
predicted249	0.443	0.0021481	predicted RNA	antisense: SE1157
predicted65	0.444	0.000110313	predicted RNA	antisense: SE0387
predicted409	0.444	0.000213199	predicted RNA	antisense: SE1885
predicted190	0.444	0.00187112	predicted RNA	antisense: rpmB
predicted60	0.444	0.00400504	predicted RNA	antisense: SE0358
predicted340	0.445	0.00070452	predicted RNA	antisense: SE1514
predicted267	0.45	0.0059735	predicted RNA	antisense: SE1231
predicted366	0.451	0.000831528	predicted RNA	antisense: SE1595
predicted11	0.452	0.00194516	predicted RNA	antisense: SE0013 SE0015 rplI
predicted269	0.454	0.00203177	predicted RNA	antisense: SE1233
predicted171	0.455	0.000669178	predicted RNA	antisense: SE0813
predicted3	0.455	0.000825	predicted RNA	antisense: SE0002
predicted102	0.458	0.00119122	predicted RNA	antisense: secG
predicted7	0.459	0.00597221	predicted RNA	antisense: SE0005
SE1683	0.463	0.00786566	SE1683	hypothetical protein
predicted202	0.468	0.000363805	predicted RNA	antisense: tsf rpsB pyrH
predicted170	0.468	0.0007154	predicted RNA	antisense: SE0811
SE0405	0.468	0.0954514	SE0405	lipoprotein
predicted453	0.469	0.00279193	predicted RNA	antisense: SE2053
predicted123	0.47	0.00324004	predicted RNA	antisense: SE0621
SE2393	0.47	0.0343792	SE2393	poly (glycerol-phosphate) alpha-glucosyltransferase
predicted361	0.471	0.000340307	predicted RNA	antisense: SE1578
SE1813	0.471	0.0521065	SE1813	50S ribosomal protein L14
predicted382	0.472	0.000647974	predicted RNA	antisense: rpmE2
SE0161	0.473	0.0164634	SE0161	transposase
predicted212	0.476	0.0010281	predicted RNA	antisense: SE0951
predicted88	0.478	0.0019702	predicted RNA	antisense: SE0494
predicted332	0.478	0.00313893	predicted RNA	antisense: SE1437
predicted324	0.484	0.000756553	predicted RNA	antisense: SE1411 SE1412
SE1383	0.484	0.0117556	SE1383	Xaa-Pro dipeptidase
predicted179	0.488	0.000815285	predicted RNA	antisense: SE0863 SE0865 SE0864
predicted125	0.492	0.00512047	predicted RNA	antisense: SE0622
predicted129	0.494	0.0436853	predicted RNA	antisense: SE0627 SE0626
predicted124	0.497	0.00526049	predicted RNA	antisense: SE0622
predicted48	0.498	0.0085515	predicted RNA	antisense: gltX
predicted442	0.499	0.00297438	predicted RNA	antisense: SE2015 SE2016
predicted74	0.5	0.00128293	predicted RNA	antisense: SE0422
predicted164	0.5	0.0043268	predicted RNA	antisense: SE0788 SE0787
